# Supplementary material
Source: PubMed Central journal article supplement (PMC11072283)
Supplement: 18_2021_3827_MOESM1_ESM.pdf [file 18_2021_3827_MOESM1_ESM.pdf]

**Electronic Supplementary Material for:**

---

# Moonlighting of mitotic regulators in cilium disassembly

---

## **Authors**

Cenna Doornbos<sup>1,2</sup> and Ronald Roepman<sup>1,2</sup>

## **Affiliations**

1 Department of Human Genetics, Radboud University Medical Center, Nijmegen, The Netherlands

2 Radboud Institute for Molecular Life Sciences, Radboud University Medical Center, Nijmegen, The Netherlands

## **Correspondence**

Ronald Roepman, Department of Human Genetics, Radboud University Medical Center, Nijmegen, The Netherlands.

Email: [Ronald.Roepman@radboudumc.nl](mailto:Ronald.Roepman@radboudumc.nl)

## **ORCID IDs**

Cenna Doornbos: 0000-0002-0613-3651

Ronald Roepman: 0000-0002-5178-8163

**Electronic Supplementary Material – Table 1 – Protein names, alternative names and Uniprot ACs**

| <b>Name</b>   | <b>Full name</b>                                             | <b>Alternative name(s)</b>                              | <b>Abbreviation from alternative name</b>           | <b>Uniprot AC</b> |
|---------------|--------------------------------------------------------------|---------------------------------------------------------|-----------------------------------------------------|-------------------|
| <b>ANAPC2</b> | Anaphase-promoting complex subunit 2                         | <b>APC2</b> , KIAA1406                                  | -                                                   | Q9UJX6            |
| <b>ANKS6</b>  | Ankyrin repeat and SAM domain-containing protein 6           | ANKRD14, PKDR1, SAMD6                                   | -                                                   | Q68DC2            |
| <b>ATF4</b>   | Cyclic AMP-dependent transcription factor ATF-4              | CREB2, TXREB, TaxREB67                                  | Activating transcription factor 4                   | P18848            |
| <b>AURKA</b>  | Aurora kinase A                                              | AIK, AIRK1, ARK1, AURA, AYK1, BTAK, IAK1, STK15, STK6   | -                                                   | O14965            |
| <b>BORA</b>   | Protein aurora borealis                                      | C13orf34, FLJ22624                                      | -                                                   | Q6PGQ7            |
| <b>BUB1</b>   | Mitotic checkpoint serine/threonine-protein kinase BUB1      | BUB1L, BUB1A                                            | Budding uninhibited by benzimidazoles 1 homologue   | O43683            |
| <b>BUB1B</b>  | Mitotic checkpoint serine/threonine-protein kinase BUB1 beta | <b>BUBR1</b> , MAD3L, SSK1                              | Budding uninhibited by benzimidazoles 1 homologue B | O60566            |
| <b>BUB3</b>   | Mitotic checkpoint protein BUB3                              | BUB3L                                                   | Budding uninhibited by benzimidazoles 3 homologue   | O43684            |
| <b>CALM1</b>  | Calmodulin-1                                                 | CALM, CAM, CAM1                                         | -                                                   | P0DP23            |
| <b>CCP110</b> | Centriolar coiled-coil protein of 110 kDa                    | <b>CEP110</b> , CP110, KIAA0419                         | -                                                   | O43303            |
| <b>CDC14A</b> | Dual specificity protein phosphatase CDC14A                  | <b>CDC14</b> , CDC14A1, Cdc14A2, DFNB105                | Cell division cycle 14 homolog A                    | Q9UNH5            |
| <b>CDC20</b>  | Cell division cycle protein 20 homolog                       | <b>p55</b> , p55CDC, CDC20A                             | -                                                   | Q12834            |
| <b>CDK5</b>   | Cyclin-dependent-like kinase 5                               | CDKN5, PSSALRE                                          | -                                                   | Q00535            |
| <b>CDKN1A</b> | Cyclin-dependent kinase inhibitor 1                          | <b>p21</b> , CAP20, CDKN1, CIP1, MDA6, PIC1, SDI1, WAF1 | -                                                   | P38936            |
| <b>CENPE</b>  | Centromere-associated protein E                              | KIF10, PPP1R61                                          | -                                                   | Q02224            |
| <b>CENPF</b>  | Centromere protein F                                         | <b>Mitosin</b> , HCP-1                                  | -                                                   | P49454            |
| <b>CENPJ</b>  | Centromere protein J                                         | <b>CPAP</b> , <b>SAS4</b> , LAP, LIP1                   | -                                                   | Q9HC77            |
| <b>CEP104</b> | Centrosomal protein of 104 kDa                               | KIAA0562, JBTS25, GlyBP, RP1-286D6.4, CFAP256, ROC22    | -                                                   | O60308            |
| <b>CEP131</b> | Centrosomal protein of 131 kDa                               | <b>AZI1</b> , KIAA1118                                  | -                                                   | Q9UPN4            |
| <b>CEP290</b> | Centrosomal protein of 290 kDa                               | <b>NPHP6</b> , MKS4, BBS14, KIAA0373                    | -                                                   | O15078            |

| Name          | Full name                                            | Alternative name(s)                                                     | Abbreviation from alternative name | Uniprot AC |
|---------------|------------------------------------------------------|-------------------------------------------------------------------------|------------------------------------|------------|
| <b>CEP41</b>  | Centrosomal protein of 41 kDa                        | TSGA14, DKFZp762H1311, FLJ22445, JBTS15                                 | -                                  | Q9BYV8     |
| <b>CKAP5</b>  | Cytoskeleton-associated protein 5                    | <b>ch-TOG</b> , KIAA0097, TOG, TOGp                                     | -                                  | Q14008     |
| <b>CLASP1</b> | CLIP-associating protein 1                           | KIAA0622, MAST1, hOrbit1                                                | -                                  | Q7Z460     |
| <b>CLASP2</b> | CLIP-associating protein 2                           | KIAA0627, hOrbit2                                                       | -                                  | O75122     |
| <b>CLIP1</b>  | CAP-Gly domain-containing linker protein 1           | <b>CLIP170</b> , CYLN1, RSN                                             | -                                  | P30622     |
| <b>CLIP2</b>  | CAP-Gly domain-containing linker protein 2           | <b>CLIP115</b> , CYLN2, KIAA0291, WBSCR3, WBSCR4, WSCR4                 | -                                  | Q9UDT6     |
| <b>DVL2</b>   | Segment polarity protein dishevelled homolog DVL-2   | DSH                                                                     | -                                  | O14641     |
| <b>ESPL1</b>  | Separin                                              | ESP1, KIAA0165                                                          | Extra spindle poles-like 1 protein | Q14674     |
| <b>FBXW7</b>  | F-box/WD repeat-containing protein 7                 | FBW7, FBX30, SEL10, hCdc4, hAgo                                         | -                                  | Q969H0     |
| <b>FZD1</b>   | Frizzled-1                                           | <b>FZ1</b> , FZE1, DKFZp564G072                                         | -                                  | Q9UP38     |
| <b>FZR1</b>   | Fizzy-related protein homolog                        | <b>CDH1</b> , FYR, FZR, KIAA1242                                        | -                                  | Q9UM11     |
| <b>GLI2</b>   | Zinc finger protein GLI2                             | THP, THP1, THP2, HPE9                                                   | -                                  | P10070     |
| <b>HDAC6</b>  | Histone deacetylase 6                                | JM21, HD6, KIAA0901                                                     | -                                  | Q9UBN7     |
| <b>HIF1A</b>  | Hypoxia-inducible factor 1-alpha                     | BHLHE78, MOP1, PASD8                                                    | -                                  | Q16665     |
| <b>INVS</b>   | Inversin                                             | <b>INV</b> , <b>NPHP2</b>                                               | -                                  | Q9Y283     |
| <b>IQCB1</b>  | IQ calmodulin-binding motif-containing protein 1     | <b>NPHP5</b> , KIAA0036, OK/SW-cl.85                                    | -                                  | Q15051     |
| <b>KIF17</b>  | Kinesin-like protein KIF17                           | KIAA1405, KIF3X                                                         | -                                  | Q9P2E2     |
| <b>KIF24</b>  | Kinesin-like protein KIF24                           | C9orf48, bA571F15.4, FLJ10933, FLJ43884                                 | Kinesin superfamily protein 24     | Q5T7B8     |
| <b>KIF2A</b>  | Kinesin-like protein KIF2A                           | KIF2, KNS2                                                              | -                                  | O00139     |
| <b>KNL1</b>   | Kinetochose scaffold 1                               | <b>Blinkin</b> , <b>CASC5</b> , KIAA1570, D40/AF15q14, AF15q14, CT29    | Kinetochose-null protein 1         | Q8NG31     |
| <b>KNTC1</b>  | Kinetochose-associated protein 1                     | <b>ROD</b> , hROD, hsROD, KIAA0166                                      | -                                  | P50748     |
| <b>MAD2L1</b> | Mitotic spindle assembly checkpoint protein MAD2A    | MAD2, HSMAD2                                                            | -                                  | Q13257     |
| <b>MAPK14</b> | Mitogen-activated protein kinase 14                  | <b>p38<math>\alpha</math></b> , CSBP, CSBP1, CSBP2, CSPB1, MXI2, SAPK2A | -                                  | Q16539     |
| <b>MAPRE1</b> | Microtubule-associated protein RP/EB family member 1 | <b>EB1</b>                                                              | -                                  | Q15691     |

| Name            | Full name                                                   | Alternative name(s)                                  | Abbreviation from alternative name                                       | Uniprot AC |
|-----------------|-------------------------------------------------------------|------------------------------------------------------|--------------------------------------------------------------------------|------------|
| <b>MAPRE3</b>   | Microtubule-associated protein RP/EB family member 3        | <b>EB3</b> , RP3                                     | -                                                                        | Q9UPY8     |
| <b>MIS12</b>    | Protein MIS12 homolog                                       | <b>MTW1</b> , MGC2488, KNTC2AP                       | -                                                                        | Q9H081     |
| <b>MTOR</b>     | Serine/threonine-protein kinase mTOR                        | <b>FRAP</b> , FRAP1, FRAP2, RAFT1, RAPT1             | Mammalian target of rapamycin                                            | P42345     |
| <b>NDC80</b>    | Kinetochore protein NDC80 homolog                           | <b>HEC1</b> , HEC, KNTC2, TID3                       | Nuclear division cycle                                                   | O14777     |
| <b>NDE1</b>     | Nuclear distribution protein nudE homolog 1                 | NUDE, NUDE1                                          | -                                                                        | Q9NXR1     |
| <b>NDEL1</b>    | Nuclear distribution protein nudE-like 1                    | EOPA, MITAP1, NUDEL                                  | -                                                                        | Q9GZM8     |
| <b>NEDD9</b>    | Enhancer of filamentation 1                                 | <b>HEF1</b> , CASL, CASS2, p105, NY-REN-12, HEF1-p55 | Neural precursor cell expressed developmentally down-regulated protein 9 | Q14511     |
| <b>NEK1</b>     | Serine/threonine-protein kinase Nek1                        | NY-REN-55, KIAA1901                                  | -                                                                        | Q96PY6     |
| <b>NEK2</b>     | Serine/threonine-protein kinase Nek2                        | NEK2A, NLK1, RP67, PPP1R111                          | -                                                                        | P51955     |
| <b>NEK8</b>     | Serine/threonine-protein kinase Nek8                        | JCK, NEK12A                                          | -                                                                        | Q86SG6     |
| <b>NPHP3</b>    | Nephrocystin-3                                              | KIAA2000                                             | -                                                                        | Q7Z494     |
| <b>NPHP4</b>    | Nephrocystin-4                                              | POC10, KIAA0673                                      | -                                                                        | O75161     |
| <b>NUP93</b>    | Nuclear pore complex protein Nup93                          | KIAA0095                                             | -                                                                        | Q8N1F7     |
| <b>OFD1</b>     | Oral-facial-digital syndrome 1 protein                      | CXorf5, 71-7A, JBTS10                                | -                                                                        | O75665     |
| <b>PAFAH1B1</b> | Platelet-activating factor acetylhydrolase IB subunit alpha | <b>LIS1</b> , LIS, PAFAHA, MDCR, MDS                 | -                                                                        | P43034     |
| <b>PCM1</b>     | Pericentriolar material 1 protein                           | PTC4                                                 | -                                                                        | Q15154     |
| <b>PIFO</b>     | Protein pitchfork                                           | C1orf88, FLJ23853                                    | -                                                                        | Q8TCI5     |
| <b>PLK1</b>     | Serine/threonine-protein kinase PLK1                        | PLK                                                  | -                                                                        | P53350     |
| <b>PTP4A3</b>   | Protein tyrosine phosphatase type IV A 3                    | <b>PRL-3</b> , PRL3, PRLR                            | -                                                                        | O75365     |
| <b>PTTG1</b>    | Securin                                                     | EAP1, PTTG, TUTR1                                    | Pituitary tumor-transforming gene 1 protein                              | O95997     |
| <b>RAB8A</b>    | Ras-related protein Rab-8A                                  | MEL, RAB8                                            | -                                                                        | P61006     |
| <b>RAN</b>      | GTP-binding nuclear protein Ran                             | ARA24, OK/SW-cl.81                                   | -                                                                        | P62826     |
| <b>RANBP2</b>   | E3 SUMO-protein ligase RanBP2                               | <b>NUP358</b> , ADANE                                | -                                                                        | P49792     |
| <b>RANGAP1</b>  | Ran GTPase-activating protein 1                             | KIAA1835, SD, FUG1                                   | -                                                                        | P46060     |
| <b>RPGRIP1L</b> | Protein fantom                                              | <b>NPHP8</b> , MKS5, FTM, KIAA1005                   | -                                                                        | Q68CZ1     |
| <b>TMEM107</b>  | Transmembrane protein 107                                   | DC20, UNQ638/PRO1268                                 | -                                                                        | Q6UX40     |

| Name            | Full name                                              | Alternative name(s)                                   | Abbreviation from alternative name | Uniprot AC |
|-----------------|--------------------------------------------------------|-------------------------------------------------------|------------------------------------|------------|
| <b>TMEM216</b>  | Transmembrane protein 216                              | <b>MKS2</b> , HSPC244, JBTS2                          | -                                  | Q9P0N5     |
| <b>TOGARAM1</b> | TOG array regulator of axonemal microtubules protein 1 | <b>Creserin</b> , Creserin-1, TOG2, FAM179B, KIAA0423 | -                                  | Q9Y4F4     |
| <b>TP53</b>     | Cellular tumor antigen p53                             | <b>p53</b> , LFS1                                     | -                                  | P04637     |
| <b>TTK</b>      | Dual specificity protein kinase TTK                    | <b>MPS1</b> , MPS1L, ESK, NCP, PYT, CT96, MPH1        | Tyrosine/threonine-protein kinase  | P33981     |
| <b>UBE2C</b>    | Ubiquitin-conjugating enzyme E2 C                      | <b>UBCH10</b>                                         | -                                  | O00762     |
| <b>VDAC3</b>    | Voltage-dependent anion-selective channel protein 3    | HD-VDAC3                                              | -                                  | Q9Y277     |
| <b>WNT5A</b>    | Protein Wnt-5a                                         | <b>WNT-5A</b> , hWNT5A                                | -                                  | P41221     |
| <b>XPO1</b>     | Exportin-1                                             | <b>CARM1</b> , CAF2, SPAC1805.17, SPAC1B2.01          | -                                  | O14980     |
| <b>ZW10</b>     | Centromere/kinetochore protein zw10 homolog            | KNTC1AP                                               | Zeste-White 10                     | O43264     |
| <b>ZWILCH</b>   | Protein zwilch                                         | FLJ10036, KNTC1AP                                     | -                                  | Q9H900     |

Relevant protein information including protein name and Uniport AC for all recalled proteins. Alternative names in **bold** are often used interchangeably with the official protein name or these proteins have (recently) been renamed.
